# Supplementary material
Source: PubMed Central journal article supplement (PMC8658065)
Supplement: Supp_FigS6.pdf [file Supp_FigS6.pdf]

List of the proteins in the alignment:

**PAPS reductase (*bona fide* CysH)**

WP\_012828290\_1 Haliangium\_ochraceum\_DSM\_14365  
NP\_285339\_1 Deinococcus\_radiodurans\_R1  
WP\_005296954\_1 Corynebacterium\_jeikeium\_K411  
WP\_010983569\_1 Streptomyces\_avermitilis\_MA-4680\_NBRC\_14893  
WP\_023885019\_1 Mycobacterium\_avium\_RCAD0278  
WP\_041809132\_1 Bacillus\_cellulosilyticus\_DSM\_2522  
2GOY\_A Pseudomonas\_aeruginosa  
WP\_014029954\_1 Acidithiobacillus\_ferrivorans\_SS3  
HMI48\_11565 A. ferrooxidans\_DCM\_16786 (In extended type IV-A locus)  
WP\_012586919\_1 Shewanella\_baltica\_OS223

**MGE-associated CysH**

WP\_011375648\_1 Prochlorococcus\_marinus\_MIT\_9312  
WP\_069868654\_1 Pseudomonas\_fluorescens\_Pt14  
WP\_003668031\_1 Lactobacillus\_reuteri\_JCM\_1112  
WP\_000391487\_1 Acinetobacter\_baumannii\_AR\_0088  
WP\_011277382\_1 Sulfolobus\_acidocaldarius\_DSM\_639  
WP\_060553423\_1 Klebsiella\_pneumoniae\_KP-1  
WP\_011950590\_1 Sphingomonas\_wittichii\_RW1  
WP\_099516204\_1 Microvirga\_ossetica\_V53M  
WP\_041437462\_1 Thermomicrobium\_roseum\_DSM\_5159  
ADC73210\_1 Thioalkalivibrio\_sp.\_K90mix (In extended type IV-A locus)  
ERX94024\_1 Pseudomonas\_aeruginosa\_BL23 (In extended type IV-A locus)  
OPY23619\_1 Methanobacterium\_sp.\_PtaU1.Bin097

**IV-B associated CysH**

ALAS01000151.1\_4 Bacillus\_coagulans\_DSM\_1 = ATCC\_7050  
HCZ47720\_1 Gammaproteobacteria\_bacterium\_isolate\_UBA10968  
WP\_069953983\_1 Mycobacterium\_chimaera\_AH16  
WP\_125053220\_1 Rhodococcus\_NJ-530  
PBA69169\_1 Mycobacterium\_avium  
SKT67694\_1 Mycobacteroides\_abscessus\_subsp.\_massiliense  
ABH00659\_1 Rhodococcus\_jostii\_RHA1

WP\_012828290\_1 MSTASSQLPPPPAEDEHASGASASAADDTGRGDL SAWFDAERLAAKSAE-----LERATPQEIILAFALASFA  
NP\_285339\_1 -----MMTAEVRTPEQGGGLTTEPRAPRSAPGHADASAPAFGPETDPRDIIRWALAAHP

WP\_005296954\_1  
WP\_010983569\_1  
WP\_023885019\_1  
WP\_041809132\_1  
2GOY\_A  
WP\_014029954\_1  
HMI48\_11565  
WP\_012586919\_1  
WP\_011375648\_1  
WP\_069868654\_1  
WP\_003668031\_1  
WP\_000391487\_1  
WP\_011277382\_1  
WP\_060553423\_1  
WP\_011950590\_1  
WP\_099516204\_1  
WP\_041437462\_1  
ADC73210\_1  
ERX94024\_1  
OPY23619\_1  
ALAS01000151.1\_4  
HCZ47720\_1  
WP\_069953983\_1  
WP\_125053220\_1  
PBA69169\_1  
SKT67694\_1  
ABH00659\_1

-----MSLVDATGLLGGNSDDFRDPAESPQGAPTKTTPLSDEERAANEQLVAEWNDKLEGASAEIIMEWVAEHVP  
-----MRTVQADTDTGTERATGRDAELKTLAEQAGR-----LEDASALEIILQWAADTFG  
-----MSDVATDFTEEQLRELAERGASE-----LEGASAIIDILRWTDEHFG  
-----MSNQVLLYENLKDQDYADLNA-----KMKNDALHVIKWAYEQFN  
-----MLPFATIPATERNNSAAQHQPSPMSQPFDLPALASSLADKSPQDILKAAFEHFG  
-----MSVETRIQDVLLLLFGELHN-----MKPICH-----  
-----MVDHQQKTSDTVPTVTVSTAELTALLSAPKAEQAIELKRINQFLAGLSAQERVLWGLTYLP  
-----MIENIQKDIQPELINKYNQE-----LRDMTAQEMLTWGYKEFD  
-----MSNRI-----  
-----MLNERER-----SLNVSLLDQIKTQASITD  
-----MEEKIK-----  
-----METRVEEAIELIINASE-----  
-----MAERH-----  
-----MT-----ARGDEGGEPPVRH-----  
-----MSAVTKRMEDAALDGK-----  
-----MQTGERRVRH-----  
MNRSRHPRAADTGPEPVESQMMSHAFDDQMILPGLGDSLGLNLREPPRST-----HEHGVFFSAPSIDLDGYD  
-----MHPTISRAHQFDDQVVI PALGQQLTLLGFEPEPPV-----LAEGTYFDAPAVDLDSYD  
-----MMPQKDRDFTFMWNRTKEHKQRVKHAEKNVKHTIEYYN  
-----MMTEAEKETYMLRATLPGFKRKVSRSLIIRREALAIEG  
-----MRPDTVQRALLHART-----RQHRRAVEQAEWLIAHAM  
-----MRGPFVDVALRAIRARRRGP-----SAHRHLLDRIAEHLECND  
-----MSGTPRADGLDLTTLRALRRPR-----PNLAAIKERIEEHLDNHD  
-----MRGPFVDVALRAIRARRRGP-----SAHRHLLDRIAEHLECND  
-----MNAQLDMQQLRAIAAHQRGP-----RTYAGLLDRIGEHLDAHD  
-----MVNAPDPGLDLAMLRLGRAPSAKADP-----GAVADILTRIEAHLAHD

WP\_012828290\_1  
NP\_285339\_1  
WP\_005296954\_1  
WP\_010983569\_1  
WP\_023885019\_1  
WP\_041809132\_1  
2GOY\_A  
WP\_014029954\_1  
HMI48\_11565  
WP\_012586919\_1  
WP\_011375648\_1  
WP\_069868654\_1  
WP\_003668031\_1

P---RVAIST---AFGVEGCA--LLHMAVQIDPS--VR---VFTIDTG-----YLFD---ETQQLIERMRERL-G  
D---LLMPS---AFNLNGVV--LLDLAAQAGYR--GE---VVFVDTG-----YHFP---ETLATRDRLESRYPE  
G---KVAV---TMSMQDTV--LAELAEGRLAEDRAE--LVFLDTG-----YHFA---ETLETRDKVQORY-N  
K---KFCV---TSSMEDAV--VAHLASRTFPG--VD---VVFLDTG-----YHFP---ETIGTRDAVEAVM-D  
PVDGPRGWATCKYVVACNMQDAV--MVSLACDVRPG--VP---VLFLDTG-----YHFP---ETIGTRDAVEAVY-D  
D---DLVYAC---SFGAEGIV--LIDLISKVKKD--AK---VVFLDTN-----VHFD---ETYELIEQMKKKYP  
D---ELWISF---S--GAEDVV--LVDMAWKLNRN--VK---VFSLDTG-----RLHP---ETYRFIDQVREHY-G  
A-PYAPAAFAT---SFGAEDMV--LTDLIAKHAPW--ME---IFTLDTG-----RLPE---ETYRLMQETRGRHY-R  
-----VVSF---SGGKDDTA--TLLLALERVPREQIV---AIFCDTG-----NEIP---VTQRYLDGLERHL-G  
G---NHALSS---SFGIQAAV--MLHMVSQAQAN--IP---VILTDTG-----YLFP---ETYQFIDELTQRL-S  
N---QFAITT---SFGIQSSV--LLNMVSKLCLQKKIK--IFWIDTG-----YLPP---ETYHYAEKLIVDL-S  
-----VCQF---SCGAASAVATKLALAEYGATHDVQ--IINAFLA-----NEHE---DNRRFALNCEAWF-G  
S---VLVSF---SMGKDSIA--VMDLCFKYFKH--VQP--FFMYMVP-----LQFQ-----EEALAKYEHYH-N

WP\_000391487\_1  
WP\_011277382\_1  
WP\_060553423\_1  
WP\_011950590\_1  
WP\_099516204\_1  
WP\_041437462\_1  
ADC73210\_1  
ERX94024\_1  
OPY23619\_1  
ALAS01000151.1\_4  
HCZ47720\_1  
WP\_069953983\_1  
WP\_125053220\_1  
PBA69169\_1  
SKT67694\_1  
ABH00659\_1

-----VVSF----SGGRTSGYTVNIFKDDPEAH-----FVYMDTG-----AEHP----ATYQFIKDIKVKHW-K  
ELSNLPWELGF----SGGKDSSTVLSLTLKAMERGAMIKTLYVVYADTL-----LEHPILRKEALDALESILKVYP-N  
-----VLGI----SGGKDSAA-LAIYMRQHHPPELNIE---YFFTDG-----KELP----EVYEFLGKLEGFL-G  
-----ILSL----SGGKDSAA-LAIYLRDRVPE--ME---YIFHSD-----KELR----ETYDYLGRLAIL-G  
A---RHIVPL----SGGKDSAA-LAIYLSQQYPHLPFE---YVFSDTG-----AELP----ETYEYFERLEHVL-G  
-----ILSL----SGGKDSAA-LAIYLRDRIPE--LE---YVFCDTG-----EELP----ETYEYLERLEAFL-G  
R----IVVCF----SGGKDSIASLLHLLDEGVDPAATE---LWVHHDVVDGREGSTLMDWP----FMADYNRKLQSF-D  
H----VIVC----VSGKDSIACLLTLIEQGVDLRRVE---LWVHHRVDGAEGSTLMDWA----FNDSFIEKFAAAF-N  
P-----IILF----SGGKDSLVLHLMVMQNNN--IP---IYSDSG-----YDYG---SQQIKMPKEMTREI--  
I----KWSASV----SFGKDSLVMDDLSSQVMDE--IP---VYFMSD-----YKLP----EIYETIELSQERY-K  
E--RHTLAVSF----SGGKDSV--IRLLAQQLQPD--VP---VWSDGG-----LQLP----ETLALMEVQPAY-H  
G----FVAW----SGGKDSSTVVDLARQVDPN--IP---VVFYDSG-----LQFP----ETLAYMGELAQIW-R  
G----YLAF----SGGKDSLVALHLLTAVEPN--IP---VVFYDSG-----LEYP----QTYEYIADLADAW-N  
G----FVAW----SGGKDSSTVVDLARQVDPN--IP---VVFYDSG-----LQFP----ETLAYMGELAQIW-R  
G----FVSW----SGGKDSSTVVDLARQVDPH--IP---VVFYDSG-----LFFP----ETWHYLEDLADRW-N  
G----YVAF----SGGKDSLIVLDLARRIEPD--VP---VVFYDSG-----LDYP----ETYDYLTELTHTW-R

WP\_012828290\_1  
NP\_285339\_1  
WP\_005296954\_1  
WP\_010983569\_1  
WP\_023885019\_1  
WP\_041809132\_1  
2GOY\_A  
WP\_014029954\_1  
HMI48\_11565  
WP\_012586919\_1  
WP\_011375648\_1  
WP\_069868654\_1  
WP\_003668031\_1  
WP\_000391487\_1  
WP\_011277382\_1  
WP\_060553423\_1  
WP\_011950590\_1  
WP\_099516204\_1  
WP\_041437462\_1  
ADC73210\_1  
ERX94024\_1  
OPY23619\_1  
ALAS01000151.1\_4  
HCZ47720\_1

TEI-----ET----FHP-----ELSVAEQDER--Y-GE----ALYTRDSDA----CC-  
LTF-----VTLNAGASP-----DDG-----QTPPDLYASDPDACC-  
LPL-----EN----ITP-----VLNREEQDKV--Y-GP----RLYSRDNTA----CC-  
VNV-----IT----LTP-----RRTVAEQDAE--Y-GP----KLHDRD-PDL---CC-  
IHL-----LN----VTP-----EHTVAEQDEL--L-GK----DLFARDPNE---CC-  
LRI-----EL----KQP-----EITLEEQADQ--Y-GN----ELWIKN-PDL---CC-  
IAI-----DV--LSPDP-----RLLEPLVKEKG--L-----FSFYRDGHGE---CC-  
LPI-----QV----YFP-----EHGTVERYVRE--H-GP----NAFYES-QELRKTCC-  
VRI-----HRLKADFSAEIAAKRRFIARDQRTKREYQRV--PVLVDVYGNPVPSPRSNSQGRIRYRTV  
LNV-----KV----YQA-----PMTAAWQEAR--F-G----KLWEQGLDGLLEQYN--  
LEI-----EVLQSELSP-----ARMETIHG-----KLWETNKASDLDKYH-  
RPV-----TVLRDEKYGA-----DILQVFHRRERF--MKGRN---GAP-----CT-  
THI-----IR----VP-----HFETADFYRYGSF-----RDPDYSVPRV-----  
INL-----VCLRVVVPKMNKGVGYKIIPIDELKQDLEP--WKEMLKKYGSPYDMPF---CT-  
VKP-----IR----LTP-----IEDFISMMVERGY-----PAP----SHRFRWCM-  
KKI-----EY----LNP-----DRDFDFWLKE--Y-NH----FLP----SPQTRWCT-  
KPI-----IR----TSP-----VDTFDHWLAV--F-GG----MLP----SNHRRWCT-  
KKV-----TR----ITA-----LDLLGVSEKHGRSPF--DVVLYEHFSGFLPSRSPRWCT-  
KPI-----VR----LNP-----ERPFSHYLDL--YRG----VLP----DARTRWCT-  
LPLYFSWLEGGFEGEMCKENAHGRPHKVETP-----EGLITLERDTR--RSKPGTRLKFPQVSASLQTRWCS-  
LPVYFSWLQGGIEGEMLKMDAYSKPHMVETP-----GGVICLDRDTS--RTLTPATRRRFPQQSASLTTRWCS-  
LKI-----GR-----KAGAKHLYSC----GH----RDPN-----  
INI-----SR--AYFA-----DRRPIQEVWEK--F-----GIPGINRTTNMQNKAL  
VQS-----VT-----W-WH----RFPAAGRSPE-----

WP\_069953983\_1  
WP\_125053220\_1  
PBA69169\_1  
SKT67694\_1  
ABH00659\_1

LNF-----EV--IPAEP-----DLLTVFIAAGG--F-DH----RAPDRDLAGTLA-----  
LNL-----EV--HRADP-----PLLTVLADSGE--W-DH----HLPTRATTRALR-----  
LNF-----EV--IPAEP-----DLLTVFIAAGG--F-DH----RAPDRDLAGTLA-----  
LNF-----HT--VNAEP-----DLLTLLIAGGG--F-DH----NAPDRRLPVQLA-----  
LDL-----HR--IPTDP-----PLLQVLADSGH--W-DH----SAPVGTPLDLH-----

WP\_012828290\_1  
NP\_285339\_1  
WP\_005296954\_1  
WP\_010983569\_1  
WP\_023885019\_1  
WP\_041809132\_1  
2GOY\_A

---AMRKVEPTQRAL---R--GLDAWIA-----  
---AARKVDPLQRYL---KEQGPSALLN-----  
---RMRKVEPLARML---NPFNAWIT-----  
---KLRKVQPLEQGL---T--AYDAWAT-----  
---RLRKVEPLRRAL---RGYAAWVS-----  
---KLRKNTPLKSVL---S--GSKAWLS-----  
---GIRKIEPLKRKL---AGVRAWAT-----  
---HMRKVEPLRRAL---RGKGAWVT-----

WP\_014029954\_1  
HMI48\_11565

VRNGIEQQEVI PKTR---KAHGKVRWSNKA KRRLAVLYPTGNPFLDLCLWKGRFPSRMAQFCTEELKRNI AVTFQLD

WP\_012586919\_1  
WP\_011375648\_1  
WP\_069868654\_1  
WP\_003668031\_1  
WP\_000391487\_1  
WP\_011277382\_1  
WP\_060553423\_1  
WP\_011950590\_1  
WP\_099516204\_1  
WP\_041437462\_1

---RLNKVEPMQRAL---AELDVGTWFA-----  
---DLRKIKPLENGL---EKYKINCWAS-----  
---KLLKRRLLD AWK---Q--PGDVMVF-----  
---KIRGIYAYLRKQ---TGIAWIAG-----  
---ARMKTEPF EKYCNDVFGKNNYERWI-----  
---ERLKL RPKRFRM---EQLGK FVQLS-----  
---RQLKL RPFELWVRPMLASGDTVTSYV-----  
---KMLKLKPFENYV-----GDSPVIN YV-----  
---RMLKIHPFENHI-----GGDKAYS YI-----  
---RMLKIRPFERYV---GDDPTIHYI-----

ADC73210\_1  
ERX94024\_1  
OPY23619\_1

---SALKIDVGRRALNNQSRFDGKRVLFVT-----  
---SAAKIDVGRRAITNQDRFLGTKTLFVT-----  
---SKRFFGNLFRVM---KKHNCNLELL-----  
---KVLKKDVSDKWA---KEHGYNGIFW-----

ALAS01000151.1\_4  
HCZ47720\_1

---AVSKAALCRRE---GWDGYIL-----  
---NILISGPAAQAH---ARHGRGSLW-----  
---DILIGAPSRAAH---KAHGPGEIW-----  
---NILISGPAAQAH---ARHGRGSLW-----

WP\_069953983\_1  
WP\_125053220\_1  
PBA69169\_1  
SKT67694\_1  
ABH00659\_1

---DLMIAAPAALAH---ERFGSGSLW-----  
---EVLITEPARRAH---QLLGP GELW-----

WP\_012828290\_1  
NP\_285339\_1  
WP\_005296954\_1  
WP\_010983569\_1  
WP\_023885019\_1

-----GLRRDQGG-----ATRAQLAILERYQRGDAE--PLIKVH-----PLAN--WNR  
-----ARSRDQAS-----TRADIPFVEEGGARRRVN-----PLAH--WTR  
-----GVRRVDNA-----LRANTPVLDVDRGTGRL-----KIN-----PIVA--WSD  
-----GLRRDESP-----TRANTPVVSWDEKRRKV-----KIS-----PIAR--WTQ  
-----GLRRVEAP-----TRADAPLISFDESFKVV-----KVN-----PIAA--WTD

WP\_041809132\_1  
2GOY\_A  
WP\_014029954\_1  
HMI48\_11565  
WP\_012586919\_1  
WP\_011375648\_1  
WP\_069868654\_1  
WP\_003668031\_1  
WP\_000391487\_1  
WP\_011277382\_1  
WP\_060553423\_1  
WP\_011950590\_1  
WP\_099516204\_1  
WP\_041437462\_1  
ADC73210\_1  
ERX94024\_1  
OPY23619\_1  
ALAS01000151.1\_4  
HCZ47720\_1  
WP\_069953983\_1  
WP\_125053220\_1  
PBA69169\_1  
SKT67694\_1  
ABH00659\_1

-----GLRREQSP-----TRANTQFVNKDDKFQSI-----KIC-----PLIH--WTW  
-----GQRDQSP-----GTRSQVAVLEIDGAFSTPEKPLYKFN-----PLSS--MTS  
-----GMRREQAL-----SRQDLAVREWDAAHEMP-----KFN-----PLAD--WHG  
LIDQGFPPVSWQGIRREDESP-----NRRNAKRLERIGPKLWAFR-----PLVD--WTA  
-----GLRRSQAS-----TREALPILAIHGTRFKLL-----PIIE--WSN  
-----GVRSSQTE-----NRKEMKFLDLIRQLSLR-----PLLN--WTN  
-----GYTAEVE-----RLEDFRDRNPDRPVA-----PLIDAGLGK  
-----GEKINDSI-----VRRAMLKHSIDTQRGRFY-----PVMY--WTD  
-----GIRSDEPK-----RLPIEVLEKLSLPIHKDAKNQKAG--FRYLAEISD--FTK  
-----GVRMTESS-----ERAKQTAYNGKHEKIIRLGNPIIM-----PILD--WTT  
-----AIRADEEY-----REGYASKHKNLKIAL-----PFRENGIDK  
-----GLRADEKR-----VGYISTKANITAVY-----PFIEDGLVR  
-----GIRADENR-----SGYIGKGQVMLSEEPNIIPVY-----PFKDDGITI  
-----AIRADEAH-----RKGYSKKNITPRY-----PFIEAGITK  
-----GERREESS-----NRAKYNQMEPHACDRRAGRKARHVDRAWR-----PVLH--WPE  
-----GERRAESS-----NRSKYNQLEPHAVDRRKGRGRHVDRAWR-----PVLH--YSE  
-----GIRAGEST-----GRKNRTKGPLVRIEGSRRIAF-----PIRD--FDW  
-----GIRKQESA-----QRKWMVTSFGVTFENKQGFYRCA-----PIAY--WDA  
-----GLRAEESR-----VRAINTAQRGLLYRVQTEGYAGAWHCQ-----PIAR--WSV  
-----GVRSQESS---GRRHLY--RTQLARQARAHDFVFDRAGARQRFGGTVHRVDGTITYG-PIWD--WQT  
-----GVRADESAKGTGRWSMYNALNVRVTEDECTDCCTTAAQQRQTHGGALDRADGTHVFG-PVWN--WSS  
-----GVRSQESS---GRRHLY--RTQLARQARAHDFVFDRAGARQRFGGTVHRVDGTITYG-PIWD--WQT  
-----GVRAEESH---DRALLY--RARLAAQTQAHDPMT-RAQVRAHFGGVVARKNGTITYG-PIWD--WQR  
-----GVRADESA-----ARRHLYTRGGRRDGI---VTRADGTTAYG-PIWN--WTI

WP\_012828290\_1  
NP\_285339\_1  
WP\_005296954\_1  
WP\_010983569\_1  
WP\_023885019\_1  
WP\_041809132\_1  
2GOY\_A  
WP\_014029954\_1  
HMI48\_11565  
WP\_012586919\_1  
WP\_011375648\_1  
WP\_069868654\_1  
WP\_003668031\_1  
WP\_000391487\_1  
WP\_011277382\_1  
WP\_060553423\_1

SDTWRYVLD---NEVPYNPLLDQ-GYK-----SIGCWPCTR-----AVG  
EQLEAYAAE---HDLPVNPLYFD-GFL-----SIGCWPCTR-----AVK  
EDVEAYIND---HDLIINPLTKQ-GYP-----SIGCETCTL-----PVA  
DDVDAYVAE---HGVLTNPLLLMD-GYP-----SVGCAPCTR-----RVL  
EQVDEYIER---NRVLVNPLVQE-GYP-----SIGCAPCTA-----KPA  
DEIWEYIHL---FNLPYNKLHDQ-GYP-----SIGSKCTF-----PVE  
EEVWGYIRM---LELPYNLSHER-GYI-----SIGCEPCTR-----PVL  
EEVWDYIRR---FEVPYNRLHDQ-GYP-----SIGCAPCTRA-----VSP  
QQTVDVFRS---QDCPLNPLYSQ-GQS-----RVGCV-CINTNKQGLAQTAARYPEEIDRIEDWEWL  
KDVHLYLTQ---FDLPYHPLWDQ-GYV-----SVGDTHSSK-----PLE  
KDIFFYMKE---NNLPAHPLFSK-GYS-----TVGDWHSSTPDG-----NKT  
EDCEAMVLR---AGIKLPLMYRL-GYD-----NANCIGCVKGGEGYFRAIRQDFPEQFEA----LCR  
KEVKHYIKM---NKL LYPKFNRELGFS-----F-----HSL  
EDILDWW-----EQQPFDLAITE--HL-----G-NCVFCIKKHLNKVALAAKDEPEQAVKW--IEVT  
EDVFRYLRSERRWDGREFDYLLNL--YEVKEDNDGCGCALTTDVRFCGWVCTVVKND-----KMP  
AAVGEILEA---SGVWPEYYKW--RS-----RSGCTFCFFQKIEWARLKEYHPDAFEEA---KAY

WP\_011950590\_1  
WP\_099516204\_1  
WP\_041437462\_1  
ADC73210\_1  
ERX94024\_1  
OPY23619\_1  
ALAS01000151.1\_4  
HCZ47720\_1  
WP\_069953983\_1  
WP\_125053220\_1  
PBA69169\_1  
SKT67694\_1  
ABH00659\_1

KDIMQILED----SGLGLPPYMEW-GRS-----RSGCYFCFYQQKIEWVRLYEMHPDLY-----ALA  
GDVQRLDD----TGLGLPEYYQW--RS-----RSGCYFCFYQQIGEWQGLKERHPELY-----EKA  
HDVIRILQE----SSIGLPSYYTW--RS-----RSGCYFCFFQKIEWIGLLQHHPDLYEKA---MSY  
EQVWDALER----YGV TAPVPYRL-GWG-----RSSCMKCI FNDPTIWATLRHHFPGSL-----DAI  
EQVWELLAR----HRVEAPVPYRL-GWG-----RFSCMTCIYNSPKVWATIRKYFPERV-----TPI  
KDVWAYIIS----NNIEYLSYYDQ--YA-----AIEGYDKVRLSS-----RFS  
KDVWAYIVS----RNLDPKLYDYQKY-----QTRDWIRNT-----GWA  
LDVWAYLLT----RGATYNAAYDR--MD-----ELGIPLERQVRG-----PPL  
SHVFEYLAG----RGI PPNPLYRK--LA-----HLGAPPSLIRVD-----SII  
EDIWTHIAA----HDL PVNPIYDK--LR-----RLGTPEQHLRVS-----HIL  
SHVFEYLAG----RGI PPNPLYRK--LA-----HLGAPPSLIRVD-----SII  
GQVFSYLAG----RGI EPNPLYEK--LA-----RLGAPPAHLIRVD-----SMI  
IDVWAHIAAR----HQLPINPVYAK--LR-----ELGVPEQQHRLS-----HLI

WP\_012828290\_1  
NP\_285339\_1  
WP\_005296954\_1  
WP\_010983569\_1  
WP\_023885019\_1  
WP\_041809132\_1  
2GOY\_A  
WP\_014029954\_1  
HMT48\_11565  
WP\_012586919\_1  
WP\_011375648\_1  
WP\_069868654\_1  
WP\_003668031\_1  
WP\_000391487\_1  
WP\_011277382\_1  
WP\_060553423\_1  
WP\_011950590\_1  
WP\_099516204\_1  
WP\_041437462\_1  
ADC73210\_1  
ERX94024\_1  
OPY23619\_1  
ALAS01000151.1\_4  
HCZ47720\_1  
WP\_069953983\_1  
WP\_125053220\_1  
PBA69169\_1

ADADERAG-----R-----WGGKKA-E-----CGIHTFLPRAPESGSADGDDSDA-  
PGEDARAG-----R-----WAGKGKTE-----CGLWQGENKL-----  
PGQDPRSG-----R-----WAGSNKTE-----CGLHT-----  
EGEDARAG-----R-----WAGSTKTE-----CGLHG-----  
PGEDPRSG-----R-----WRGRNKVE-----CGLHAS-----  
EGEDLRAG-----R-----WSGSNKTE-----CGLHTK-----  
PNQHEREG-----RWWWEEATHKE-----CGLHAGNLI SKALEHHHHHH-----  
GGQDIRAG-----RWWWENPD TRE-----CGLHVVDGKVIRARSATPQKT PGQ  
VGQVSKRGFSTFMCDADDRKDRRAIFADLNIRARVEWAKGDNGTMDLFDHLELPA CASSFGLCE-----  
LGMTEET-----RFNGL--KRE-----CGLHYDI-----  
KGRATRF-----GI--KQE-----CGIHTNN-----  
VQDDL GEG-----SYLFRNRTTNVRFSLRELGDGPVRRNEKIPSCSFFCEMAEADLAAA  
AGKELSAI-----KKIYPQDYERILK---FFPEAQAGVLOYEAYKKGDE-----  
EGPRVRSE-----GRKYNHHRMYRSRLHLSDVIEAFKDHNRDELFSALRSSKRYGSGSCSESC  
VSDTLKEA----RKMIMDISRDLRYRIIDKNGKPRSLNEEGRKEVAKVF-----IGVLEKEPEAFGYDTKELREKLEK  
EKNAMDHG-----SPFTWTQGESLSEL---EKPERIIQIFKDYDERKARASAKTLNPLR  
QGYEEKAV-----EYGEQFYWCQNETLADLAKPERRAQ- IKRNWEI SEARKKAKRKNVALVET  
KGYEQGKN-----GRRYT WVDGRSLNDV-----ENMPRRDIKQKSDE-----  
EKLDPVTG-----QRFTWNPEESLQEL---ARPERVEDILT KAGQYKRDKDSTNLLSIL  
AAAYEQRFGTTIHRKKIPIKDL SRQA EPM-----EIQDAEAELEQAMRTEYTL PVRSKPGAWGLPKGAYSRS GCGPS-----  
AGYEEFGCTISRQKINVV DLSATAEAFDIID-LDALAQARQREYVLP IFTP---EGKAWQLPAGAFVTEGCGSV-----  
RGLLHKG-----SLYLDGVLMP-----YRNERPDDWNKLNK-----  
TTDGAERG-----RIIWLREFYPNYY-----DEL RWMLPKIDAYV-----  
DERAVAAG-----SMEVLRVGWPEQY-----AAWISAIPEGAAAAVAEEG-----  
DAAKLSNG-----HITWLQKGWPDF-----DRLSAALPRLREWA-----  
DGAFLERG-----RITRLRRGWPA LF-----EELARVLPRIREFV-----  
DAAKLSNG-----HITWLQKGWPDF-----DRLSAALPRLREWA-----

SKT67694\_1  
ABH00659\_1

DASQLANG-----HITWLAAGWPDQF-----ARLASSLPRLHEFT-----  
DGSHLDRG-----RLTWLRRGWPTLC-----EQLTDVLPRIQRLT-----

|                  |                           |     |
|------------------|---------------------------|-----|
| WP_012828290_1   | -----                     | 285 |
| NP_285339_1      | -----                     | 255 |
| WP_005296954_1   | -----                     | 266 |
| WP_010983569_1   | -----                     | 245 |
| WP_023885019_1   | -----                     | 247 |
| WP_041809132_1   | -----                     | 238 |
| 2GOY_A           | -----                     | 275 |
| WP_014029954_1   | I-----                    | 246 |
| HMI48_11565      | -----                     | 359 |
| WP_012586919_1   | -----                     | 260 |
| WP_011375648_1   | -----                     | 241 |
| WP_069868654_1   | P-----                    | 254 |
| WP_003668031_1   | -----                     | 232 |
| WP_000391487_1   | IV-----                   | 291 |
| WP_011277382_1   | VIEE-----                 | 308 |
| WP_060553423_1   | PVEIEDIDDIYGDDEGNCSNICCHK | 278 |
| WP_011950590_1   | LGGLEPEDDPGLRD----GCLICSL | 278 |
| WP_099516204_1   | -----DGCVICHL             | 271 |
| WP_041437462_1   | FDDDW-----DACLICHL        | 264 |
| ADC73210_1       | -----                     | 387 |
| ERX94024_1       | -----                     | 372 |
| OPY23619_1       | -----                     | 239 |
| ALAS01000151.1_4 | -----                     | 258 |
| HCZ47720_1       | -----                     | 244 |
| WP_069953983_1   | -----                     | 277 |
| WP_125053220_1   | -----                     | 284 |
| PBA69169_1       | -----                     | 277 |
| SKT67694_1       | -----                     | 276 |
| ABH00659_1       | -----                     | 264 |
